# Supplementary material for: Milk Protein-Derived Antioxidant Tetrapeptides as Potential Hypopigmenting Agents
Source: PubMed Central journal article supplement (PMC7698045; doi:10.3390/antiox9111106), 2020-11-10
Supplement: antioxidants-09-01106-s001.pdf [file antioxidants-09-01106-s001.pdf]

## Supplementary Materials:

# Milk Protein-derived Antioxidant Tetrapeptides as Potential Hypopigmenting Agents

Saerom Kong<sup>1,†</sup>, Hye-Ryung Choi<sup>2,3,†</sup>, Yoon-Jeong Kim<sup>2</sup>, Yoon-Sik Lee<sup>1,\*</sup>, Kyoung-Chan Park<sup>2,4,\*</sup> and Seon-Yeong Kwak<sup>5,6,\*</sup>

Table S1. Purity of peptides

| Peptide       | HPLC Purity (%) | Peptide         | HPLC Purity (%) |
|---------------|-----------------|-----------------|-----------------|
| YFYPEL family |                 | MHIRL family    |                 |
| YFYPEL        | 90              | MHIRL           | 89              |
| YFYF          | >99             | MHIR            | 95              |
| FYPE          | >99             | HIRL            | 93              |
| YPEL          | >99             | WYSLAMAA family |                 |
| YVEEL family  |                 | WYSLAMAA        | 90              |
| YVEEL         | 90              | WYSL            | 91              |
| YVEE          | >99             | YSLA            | 98              |
| VEEL          | 90              | SLAM            | 87              |
| YVEL          | >99             | LAMA            | 97              |
|               |                 | AMAA            | 92              |

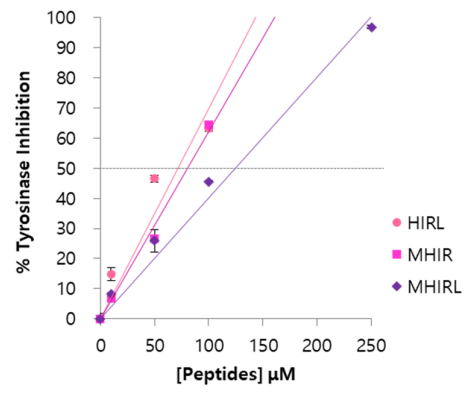

Figure S1. Determination of IC<sub>50</sub> values of MHIRL peptide family.

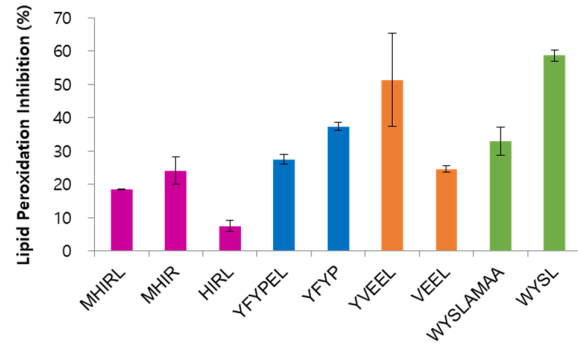

Figure S2. Lipid peroxidation inhibition (%) of antioxidant peptides.

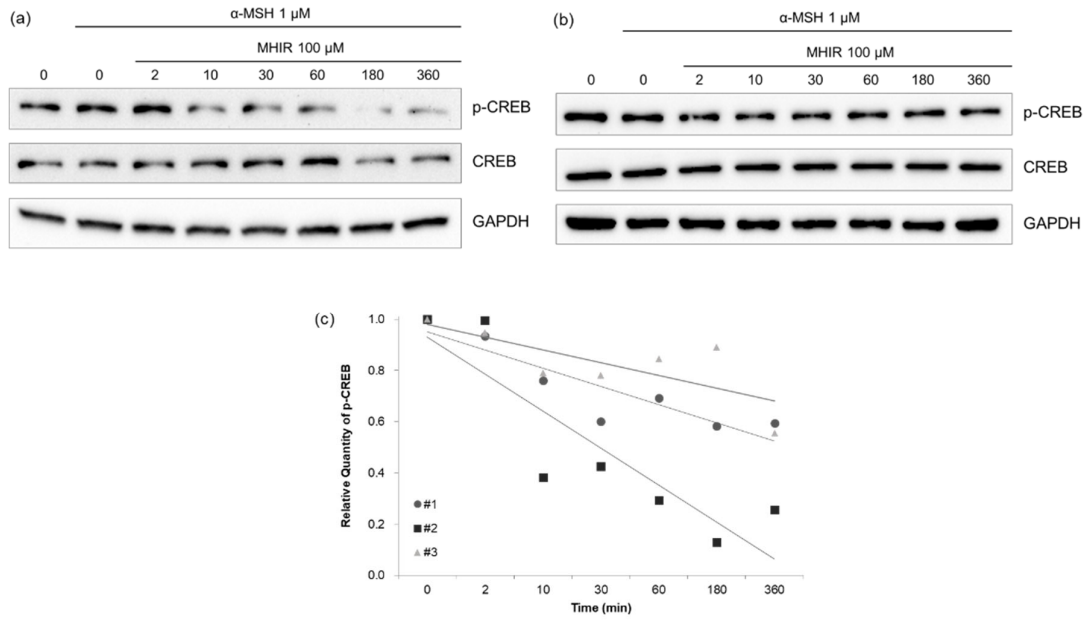

Figure S3. Effects of the MHIR peptide on melanogenesis-related signaling. The graph (a) and (b) show data from three independent experiments. The CREB phosphorylation was reduced in a time-dependent manner, but was not statistically significant. The graph (c) show all data from three independent experiments (The legend means the each experimental set 1, 2, and 3).
